# Supplementary material for: Two distinct prions in fatal familial insomnia and its sporadic form
Source: PubMed Central journal article supplement — Brain Commun. 2019 Dec 9;1(1):fcz045. doi: 10.1093/braincomms/fcz045 (PMC7425372; doi:10.1093/braincomms/fcz045), 2019-12-09
Supplement: fcz045_supplementary_data.pdf [file fcz045_supplementary_data.pdf]

## **SUPPLEMENTARY MATERIAL**

### **Supplemental method**

#### **Preparation of seeds or substrates and cell-PMCA**

129 cases of sCJD (MM1: 90 cases; MM2C: 9 cases; sFI: 10 cases; MV1: 1 case; MV2: 7 cases; VV1: 1 case, and VV2: 1 case), FFI (4 cases) or non-CJD (6 cases) was used as a seed for cell PMCA. Ten % (w/v) sCJD, FFI or non-CJD patient brain homogenates were prepared in PMCA buffer (50 mM HEPES-NaOH (pH7.5), 2% (v/v) Nonidet-P40, 160 mM NaCl, 4mM EDTA and 5% (v/v) glycerol and 5% (w/v) trehalose) with a ceramic bead homogenizer (Precellys 24 homogenizer, Bertin Instruments, France) followed by centrifugation at 8,000g for 2 min to remove insoluble debris. Brain homogenates were stored at  $-80^{\circ}\text{C}$  in small aliquots until use. Cell lysates as a substrate from FreeStyle 293F cells (Invitrogen<sup>TM</sup>) stably expressing human PrP<sup>C</sup> with methionine at codon 129 were prepared at 20% (w/v) in PMCA buffer (50 mM HEPES-NaOH (pH7.5), 2% (v/v) Nonidet-P40, 160 mM NaCl, 5% (v/v) glycerol and 5% (w/v) trehalose) with probe sonication. 4 mM EDTA were added to the cell lysates after centrifugation at 8,000 g for 2 min to remove insoluble debris, and the cell lysates were stored at  $-80^{\circ}\text{C}$  in small aliquots until use. For amplification of the CJD prions, brain homogenates were combined with the cell lysates, and 1% (w/v) Sodium Dextran Sulfate (Nacalai Tesque, Inc, Kyoto, Japan; Cat No. 10912-92) was added to the reaction mixture prior to the amplification in a 0.1-mL thin-walled polymerase chain reaction tube with a screw cap. Each PMCA round comprised 192 cycles of sonication (five pulses of 5 sec with 1 sec rest) and agitation (30

min at 37°C) and was carried out using a fully automatic cross-ultrasonic protein activating apparatus (ELESTEIN 070-GOT, Elekon Science, Japan). Either before or after PMCA, samples were digested with 50 µg/ml proteinase K at 37°C for 60 min. The digested samples were subjected to SDS-PAGE and western blot analysis. Anti-PrP monoclonal antibody 3F4 (Signet, Dedham, MA, USA) was used as the primary antibody. Anti-mouse EnVision+ (Dako) was used as the secondary antibody.

## Supplemental figures

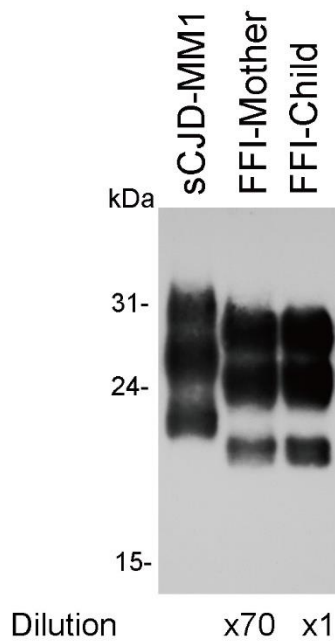

**Supplementary figure 1. Western blotting of the brains from FFI kindred.** Each sample was diluted to an appropriate concentration of PrP<sup>Sc</sup> for signal detection. PrP<sup>Sc</sup> of both FFI-Mother and FFI-Child in the brains showed type 2. Anti-PrP monoclonal antibodies 3F4 was used as the primary antibodies. Numbers indicate the molecular size standards (kDa).

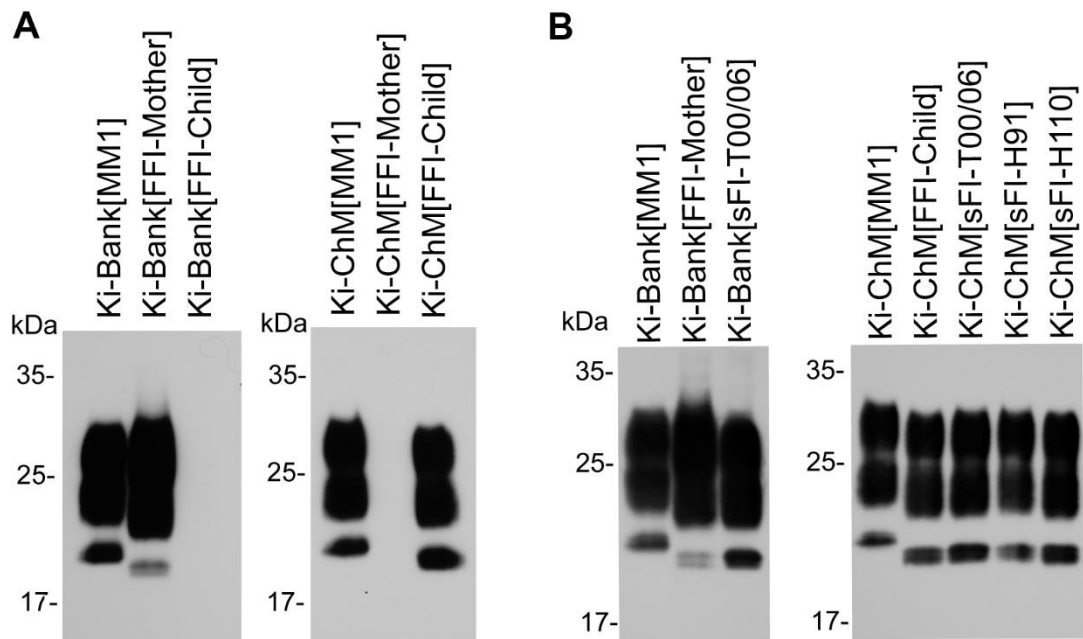

**Supplementary figure 2. Western blotting of the brains from the inoculated Ki-Bank mice or Ki-ChM mice with prions from the FFI kindred or sFI. (A)** Positive immunoreactivities were observed in Ki-Bank mice inoculated with sCJD-MM1 (Ki-Bank [sCJD-MM1]) or FFI-Mother (Ki-Bank [FFI-Mother]) and in Ki-ChM mice inoculated with sCJD-MM1 (Ki-ChM [sCJD-MM1]) or FFI-Child (Ki-ChM [FFI-Child]). **(B)** Positive immunoreactivities were observed in Ki-Bank mice inoculated with sCJD-MM1 (Ki-Bank [sCJD-MM1]), FFI-Mother (Ki-Bank [FFI-Mother]) or sFI-T00/06 (Ki-Bank [sFI-T00/06]) and in Ki-ChM mice inoculated with sCJD-MM1 (Ki-ChM [sCJD-MM1]), FFI-Child (Ki-ChM [FFI-Child]), sFI-T00/06 (Ki-ChM [sFI-T00/06]), sFI-H91 (Ki-ChM [sFI-H91]) or sFI-H110 (Ki-ChM [sFI-H110]). Anti-PrP monoclonal antibodies 3F4 for the Ki-ChM mice and SAF83 for the Ki-Bank mice were used as the primary antibodies. Numbers indicate the molecular size standards (kDa).

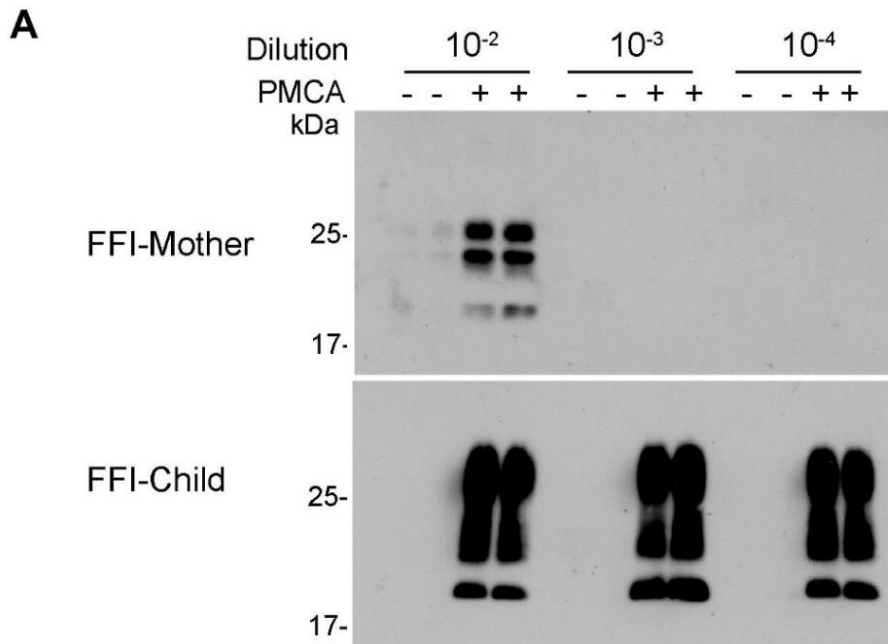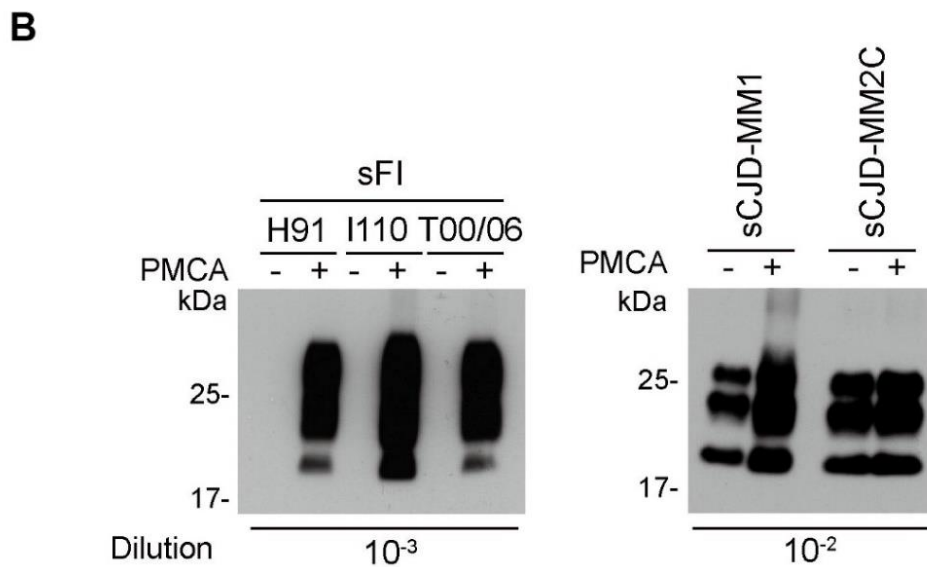

**Supplementary figure 3. Western blotting of amplified products from the brains of the FFI kindred, sFI, or sCJD using cell-PMCA. (A)** Brain homogenates from FFI-Mother or FFI-Child were amplified with the substrate lysates prepared from 293F cells stably expressing human 129MPrP<sup>C</sup>. For the amplification of prions, brain homogenates were combined with the cell lysates and the mixtures were then subjected to 192 cycles

of PMCA up to a  $10^{-4}$ -fold dilution (e.g. 100, 1,000, 10,000 times). Either before (-) or after (+), the PMCA samples were treated with proteinase K (50  $\mu\text{g}/\text{ml}$  at  $37^\circ\text{C}$  for 60 min) and subjected to western blotting using the anti-PrP monoclonal antibody 3F4. **(B)** Representative image of cell-PMCA analysis of sFI, sCJD-MM1 or -MM2C. Cell-PMCA of the brains of sFI and sCJD were performed at a  $10^{-3}$  and a  $10^{-2}$  fold dilution with cell lysates expressing human 129MPrP<sup>C</sup>, respectively. Each of the results was typical of experiments performed at least three times. Numbers show the molecular size standards (kDa).
